# Supplementary material for: Synthesis of anionic alkaline earth metal methanesulfonates bearing photo-responsive methylviologen
Source: Royal Society of Chemistry journal article supplement (doi:10.1039/d4dt02229g), 2024-01-01

## Supplementary Information

### Approach to Anionic Alkaline Earth Metal-Methanesulfonates Bearing Photo-responsive Methylviologen

Aishwarya Chauhan, Priyanka Chauhan, and Ravi Shankar\*

Department of Chemistry,

Indian Institute of Technology Delhi, Hauz Khas, New Delhi-110016, India.

\*Corresponding Author E-mail: [shankar@chemistry.iitd.ac.in](mailto:shankar@chemistry.iitd.ac.in)

## Table of contents

**Table S1.** Crystallographic data of **1–4**.

**Table S2.** Selected bond lengths [Å] and angles [°] for **1**.

**Table S3.** Selected bond lengths [Å] and angles [°] for **2**.

**Table S4.** Selected bond lengths [Å] and angles [°] for **3**.

**Table S5.** Selected bond lengths [Å] and angles [°] for **4**.

**Figure S1.** Powder X-Ray Diffraction pattern of **1-4**: black(simulated), red (primitive sample).

**Figure S2.** <sup>1</sup>H NMR spectrum of [MV{Mg(OSO<sub>2</sub>Me)<sub>3</sub>(H<sub>2</sub>O)<sub>2</sub>}<sub>2</sub>] (**1**).

**Figure S3.** <sup>1</sup>H NMR spectrum [MV{Ca(OSO<sub>2</sub>Me)<sub>3</sub>(H<sub>2</sub>O)<sub>2</sub>}<sub>2</sub>] (**2**).

**Figure S4.** <sup>1</sup>H NMR spectrum of [{Mg(OSO<sub>2</sub>Me)<sub>2</sub>(H<sub>2</sub>O)<sub>4</sub>}MV·2OSO<sub>2</sub>Me] (**3**).

**Figure S5.** <sup>1</sup>H NMR spectrum of [Me<sub>4</sub>-pip{Ca<sub>2</sub>(OSO<sub>2</sub>Me)<sub>6</sub>(H<sub>2</sub>O)<sub>2</sub>}]<sub>n</sub> (**4**).

**Figure S6.** FT-IR spectrum of **1-4**.

**Figure S7.** TGA profiles of **1-4**.

**Figure S8.** Cyclic Voltammogram of **1-3** showing repeated cycles.

**Figure S9.** Perspective ORTEP and extended structure of **2**.

**Figure S10.** Extended structure of **4** along the *bc*-plane.

**Figure S11.** EPR Spectra of **2** and **3**.

**Figure S12.** UV-vis diffused reflectance spectra of **2** and **3** under ambient light and Hg lamp.

**Figure S13.** UV-vis spectrum of **2** in methanol.

**Table S1.** Crystallographic data of **1–4**.

|                                                  | <b>1</b>                                                                                      | <b>2</b>                                                                                      | <b>3</b>                                                         | <b>4</b>                                                         |
|--------------------------------------------------|-----------------------------------------------------------------------------------------------|-----------------------------------------------------------------------------------------------|------------------------------------------------------------------|------------------------------------------------------------------|
| Empirical formula                                | C <sub>18</sub> H <sub>40</sub> Mg <sub>2</sub> N <sub>2</sub> O <sub>22</sub> S <sub>6</sub> | C <sub>18</sub> H <sub>40</sub> Ca <sub>2</sub> N <sub>2</sub> O <sub>22</sub> S <sub>6</sub> | C <sub>9</sub> H <sub>24</sub> MgNO <sub>13</sub> S <sub>3</sub> | C <sub>7</sub> H <sub>21</sub> CaNO <sub>10</sub> S <sub>3</sub> |
| CCDC no.                                         | 2358180                                                                                       | 2362824                                                                                       | 2358181                                                          | 2362825                                                          |
| Formula weight                                   | 877.50                                                                                        | 909.04                                                                                        | 474.78                                                           | 415.51                                                           |
| Temperature (k)                                  | 298(2)                                                                                        | 298(2)                                                                                        | 294(2)                                                           | 296(2)                                                           |
| Wavelength (Å)                                   | 0.71073                                                                                       | 0.71073                                                                                       | 0.71073                                                          | 0.71073                                                          |
| Crystal system                                   | Triclinic                                                                                     | Triclinic                                                                                     | Triclinic                                                        | Monoclinic                                                       |
| Space group                                      | <i>P</i> $\bar{1}$                                                                            | <i>P</i> $\bar{1}$                                                                            | <i>P</i> $\bar{1}$                                               | <i>P</i> <sub>21</sub> / <i>c</i>                                |
| a [Å]                                            | 5.7456(8)                                                                                     | 5.8064(6)                                                                                     | 5.7797(4)                                                        | 5.80060(10)                                                      |
| b [Å]                                            | 9.3568(12)                                                                                    | 9.5980(11)                                                                                    | 9.7473(7)                                                        | 31.3766(9)                                                       |
| c [Å]                                            | 16.623(2)                                                                                     | 16.929(2)                                                                                     | 17.7172(12)                                                      | 9.1840(3)                                                        |
| $\alpha$ [°]                                     | 88.264(4)                                                                                     | 88.105(4)                                                                                     | 96.331(2)                                                        | 90                                                               |
| $\beta$ [°]                                      | 85.531(4)                                                                                     | 84.771(4)                                                                                     | 93.814(2)                                                        | 93.5180(10)                                                      |
| $\gamma$ [°]                                     | 79.245(4)                                                                                     | 79.178(4)                                                                                     | 100.767(2)                                                       | 90                                                               |
| V [Å <sup>3</sup> ]                              | 875.2(2)                                                                                      | 922.67(18)                                                                                    | 970.69(12)                                                       | 1668.37(8)                                                       |
| Z                                                | 1                                                                                             | 1                                                                                             | 2                                                                | 4                                                                |
| <i>d</i> <sub>calcd.</sub> [Mg/m <sup>3</sup> ]  | 1.665                                                                                         | 1.636                                                                                         | 1.624                                                            | 1.654                                                            |
| $\mu$ [mm <sup>-1</sup> ]                        | 0.515                                                                                         | 0.732                                                                                         | 0.478                                                            | 0.797                                                            |
| F (000)                                          | 458                                                                                           | 474                                                                                           | 498                                                              | 872                                                              |
| Crystal size [mm <sup>3</sup> ]                  | 0.063 x 0.061 x<br>0.058                                                                      | 0.072 x 0.069 x<br>0.066                                                                      | 0.078 x 0.075 x<br>0.071                                         | 0.073 x 0.071 x<br>0.068                                         |
| Theta range for data collection (°)              | 2.216 to 28.314                                                                               | 2.161 to 28.356                                                                               | 2.144 to 28.318                                                  | 2.315 to 28.272                                                  |
| Reflections collected                            | 33995                                                                                         | 33514                                                                                         | 33196                                                            | 39524                                                            |
| Independent reflections                          | 4350 [R(int) =<br>0.0482]                                                                     | 4603 [R(int) =<br>0.0381]                                                                     | 4827 [R(int) =<br>0.0493]                                        | 4130 [R(int) =<br>0.1301]                                        |
| Goodness-of-fit on F <sup>2</sup>                | 1.042                                                                                         | 1.055                                                                                         | 1.568                                                            | 1.006                                                            |
| Completeness to theta = 25.242° (%)              | 100.0                                                                                         | 100                                                                                           | 100                                                              | 100                                                              |
| Max. and min. transmission                       | 0.6973 and 0.7457                                                                             | 0.7100 and<br>0.7457                                                                          | 0.6873 and<br>0.7457                                             | 0.6369 and<br>0.7457                                             |
| Data / restraints / parameters                   | 4350 / 0 / 246                                                                                | 4603 / 0 / 246                                                                                | 4827 / 0 / 281                                                   | 4103 / 0 / 213                                                   |
| Final R indices [I > 2sigma(I)]                  | R1 = 0.0334, wR2 = 0.0778                                                                     | R1 = 0.0346, wR2 = 0.0938                                                                     | R1 = 0.0563, wR2 = 0.1423                                        | R1 = 0.0499, wR2 = 0.1333                                        |
| R indices (all data)                             | R1 = 0.0452, wR2 = 0.0841                                                                     | R1 = 0.0374, wR2 = 0.0956                                                                     | R1 = 0.0579, wR2 = 0.1439                                        | R1 = 0.0516, wR2 = 0.1355                                        |
| Largest diff. peak and hole (e.Å <sup>-3</sup> ) | 0.341 and -0.373                                                                              | 0.493 and -0.722                                                                              | 1.103 and 0.963                                                  | 0.957 and -0.812                                                 |

**Table S2.** Selected bond lengths [Å] and angles [°] for **1**.

| Bond lengths [Å] |            | Bond angles [°]   |           |
|------------------|------------|-------------------|-----------|
| Mg(1)-O(1)       | 2.0812(14) | O(1)-Mg(1)-O(5)#1 | 89.22(6)  |
| Mg(1)-O(4)       | 2.0648(15) | O(4)-Mg(1)-O(1)   | 175.32(7) |
| Mg(1)-O(5)       | 2.0936(16) | O(4)-Mg(1)-O(7)   | 94.09(7)  |
| Mg(1)-O(7)       | 2.0671(15) | O(7)-Mg(1)-O(1)   | 85.24(6)  |
| Mg(1)-O(10)      | 2.0438(16) | O(7)-Mg(1)-O(5)#1 | 173.40(7) |
| Mg(1)-O(11)      | 2.0542(16) | O(10)-Mg(1)-O(1)  | 95.75(7)  |
|                  |            | O(10)-Mg(1)-O(4)  | 88.88(7)  |
|                  |            | O(10)-Mg(1)-O(11) | 172.19(7) |
|                  |            | O(11)-Mg(1)-O(1)  | 90.95(6)  |
|                  |            | O(11)-Mg(1)-O(4)  | 84.48(7)  |

Selected Hydrogen bond lengths [Å] and angles [°].

| D-H...A       | d(D-H) | d(H..A) | <DHA   | d(D..A) |
|---------------|--------|---------|--------|---------|
| O10-H10B...O6 | 0.741  | 2.16    | 166.53 | 2.886   |
| O10-H10A...O9 | 0.812  | 1.938   | 166.6  | 2.735   |
| O11-H11A...O3 | 0.794  | 1.962   | 166.99 | 2.741   |
| O11-H11B...O6 | 0.829  | 2.256   | 159.87 | 3.047   |
| C5-H5...O8    | 0.93   | 2.352   | 170.61 | 3.273   |
| C7-H7...O8    | 0.93   | 2.3     | 172.85 | 3.225   |
| C4-H4...O2    | 0.93   | 2.248   | 159.62 | 3.136   |

Symmetry transformations used to generate equivalent atoms:

#1 -x+1,-y+1,-z+1 #2 -x+1,-y+2,-z+2

**Table S3.** Selected bond lengths [Å] and angles [°] for **2**.

| Bond lengths [Å] |            | Bond angles [°]   |           |
|------------------|------------|-------------------|-----------|
| Ca(1)-O(1)       | 2.3245(11) | O(1)-Ca(1)-O(5)#1 | 87.73(5)  |
| Ca(1)-O(4)       | 2.2989(12) | O(1)-Ca(1)-O(10)  | 98.20(6)  |
| Ca(1)-O(5)#1     | 2.3321(15) | O(1)-Ca(1)-O(11)  | 89.23(5)  |
| Ca(1)-O(7)       | 2.2940(13) | O(4)-Ca(1)-O(1)   | 84.15(5)  |
| Ca(1)-O(10)      | 2.3253(14) | O(4)-Ca(1)-O(5)#1 | 94.88(6)  |
| Ca(1)-O(11)      | 2.3355(14) | O(4)-Ca(1)-O(10)  | 88.20(5)  |
|                  |            | O(4)-Ca(1)-O(11)  | 95.82(6)  |
|                  |            | O(7)-Ca(1)-O(1)   | 174.66(5) |
|                  |            | O(7)-Ca(1)-O(4)   | 93.51(6)  |
|                  |            | O(7)-Ca(1)-O(10)  | 86.50(6)  |
|                  |            | O(7)-Ca(1)-O(11)  | 86.22(6)  |
|                  |            | O(10)-Ca(1)-O(11) | 171.89(6) |

Hydrogen bond lengths [Å] and angles [°] for **2**.

| D-H...A       | d(D-H) | d(H...A) | <DHA   | d(D..A) |
|---------------|--------|----------|--------|---------|
| O10-H10B...O6 | 0.933  | 1.959    | 173.58 | 2.888   |
| O10-H10A...O9 | 0.767  | 2.001    | 166.93 | 2.754   |
| O11-H11A...O3 | 0.872  | 1.893    | 175.9  | 2.764   |
| O11-H11B...O6 | 0.782  | 2.391    | 159.86 | 3.137   |
| C4-H4...O2    | 0.93   | 2.269    | 161.65 | 3.165   |
| C5-HA...O8    | 0.93   | 2.309    | 171.7  | 3.232   |
| C7-H7...O8    | 0.93   | 2.374    | 176.93 | 3.303   |

Symmetry transformations used to generate equivalent atoms:

#1 -x+2,-y+1,-z+1 #2 -x,-y+2,-z+2

**Table S4.** Selected bond lengths [Å] and angles [°] for **3**.

| Bond lengths [Å] |            | Bond angles [°]   |           |
|------------------|------------|-------------------|-----------|
| Mg(1)-O(1)       | 2.0551(13) | O(1)-Mg(1)-O(6)   | 88.79(5)  |
| Mg(1)-O(6)       | 2.0656(12) | O(1)-Mg(1)-O(10)  | 89.84(6)  |
| Mg(1)-O(10)      | 2.0759(12) | O(1)-Mg(1)-O(11)  | 94.19(6)  |
| Mg(1)-O(11)      | 2.0740(13) | O(1)-Mg(1)-O(12)  | 178.88(6) |
| Mg(1)-O(12)      | 2.0947(13) | O(6)-Mg(1)-O(10)  | 91.35(5)  |
| Mg(1)-O(13)      | 2.0406(13) | O(6)-Mg(1)-O(11)  | 177.02(6) |
|                  |            | O(10)-Mg(1)-O(12) | 91.20(6)  |
|                  |            | O(11)-Mg(1)-O(10) | 88.57(6)  |
|                  |            | O(11)-Mg(1)-O(12) | 85.43(6)  |
|                  |            | O(13)-Mg(1)-O(10) | 175.60(6) |

Hydrogen bond lengths [Å] and angles [°].

| D-H...A        | d(D-H) | d(H...A) | <DHA   | d(D..A) |
|----------------|--------|----------|--------|---------|
| O10-H10B...O3  | 0.829  | 1.933    | 167.92 | 2.749   |
| O10-H10A...O7  | 0.76   | 2.011    | 166.76 | 2.756   |
| O11-H11A...O7  | 0.751  | 2.033    | 176.25 | 2.782   |
| O11-H11B...O8  | 0.737  | 2.123    | 155.02 | 2.808   |
| O12-H12B...O8  | 0.743  | 2.138    | 162.20 | 2.855   |
| O12-H12A...O9  | 0.769  | 2.061    | 176.08 | 2.829   |
| O13-H13B...O5  | 0.847  | 1.911    | 159.77 | 2.722   |
| O13-H13A...O10 | 0.79   | 2.089    | 161.64 | 2.85    |
| C8-H8...O2     | 0.93   | 2.281    | 171.99 | 3.204   |

Symmetry transformations used to generate equivalent atoms:

#1 -x+2,-y+1,-z+1 #2 -x,-y+2,-z+2

**Table S5.** Selected bond lengths [Å] and angles [°] for **4**.

| Bond lengths [Å] |            | Bond angles [°]     |           |
|------------------|------------|---------------------|-----------|
| Ca(1)-O(1)       | 2.3193(14) | O(1)-Ca(1)-O(2)#1   | 88.96(6)  |
| Ca(1)-O(2)#1     | 2.3307(14) | O(1)-Ca(1)-O(8)#2   | 94.61(6)  |
| Ca(1)-O(4)       | 2.2905(16) | O(1)-Ca(1)-O(10)    | 83.05(6)  |
| Ca(1)-O(7)       | 2.2979(15) | O(2)#1-Ca(1)-O(8)#2 | 85.26(6)  |
| Ca(1)-O(8)#2     | 2.3327(14) | O(4)-Ca(1)-O(1)     | 89.17(6)  |
| Ca(1)-O(10)      | 2.3688(16) | O(4)-Ca(1)-O(7)     | 88.32(7)  |
|                  |            | O(4)-Ca(1)-O(8)#2   | 93.55(6)  |
|                  |            | O(4)-Ca(1)-O(10)    | 96.99(7)  |
|                  |            | O(7)-Ca(1)-O(1)     | 167.82(6) |
|                  |            | O(7)-Ca(1)-O(10)    | 85.42(7)  |
|                  |            | O(7)-Ca(1)-O(8)#2   | 97.44(6)  |
|                  |            | O(8)#2-Ca(1)-O(10)  | 169.16(6) |

Hydrogen bond lengths [Å] and angles [°].

| D-H...A       | d(D-H) | d(H..A) | <DHA   | d(D..A) |
|---------------|--------|---------|--------|---------|
| O10-H10A...O3 | 0.723  | 2.205   | 169.73 | 2.919   |
| O10-H10B...O3 | 0.742  | 2.322   | 168.77 | 3.053   |

Symmetry transformations used to generate equivalent atoms:

#1 -x+2,-y+1,-z+1 #2 -x,-y+2,-z+2

**Figure S1.** Powder X-Ray Diffraction pattern of 1-4: black(simulated), red (primitive sample).

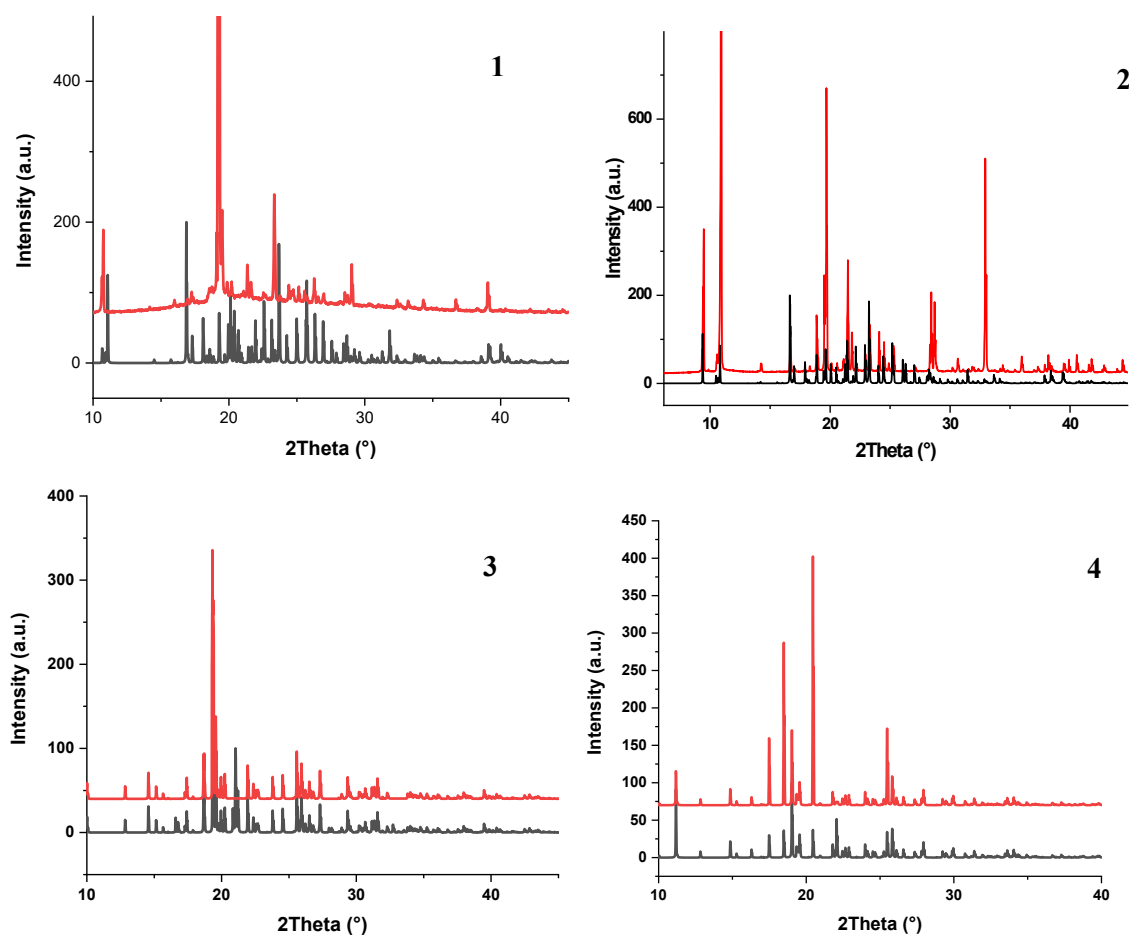

**Figure S2.**  $^1\text{H}$  NMR spectrum of  $[\text{MV}\{\text{Mg}(\text{OSO}_2\text{Me})_3(\text{H}_2\text{O})_2\}_2]$  (1) in  $\text{D}_2\text{O}$ .

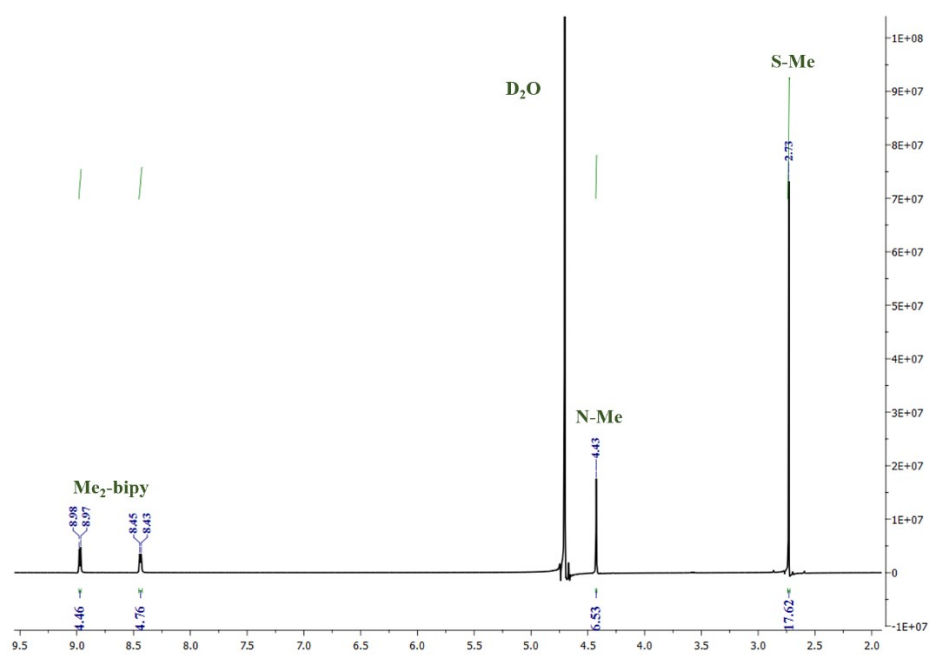



**Figure S3.**  $^1\text{H}$  NMR spectrum of  $[\text{MV}\{\text{Ca}(\text{OSO}_2\text{Me})_3(\text{H}_2\text{O})_2\}_2]$  (**2**) in  $\text{D}_2\text{O}$ .

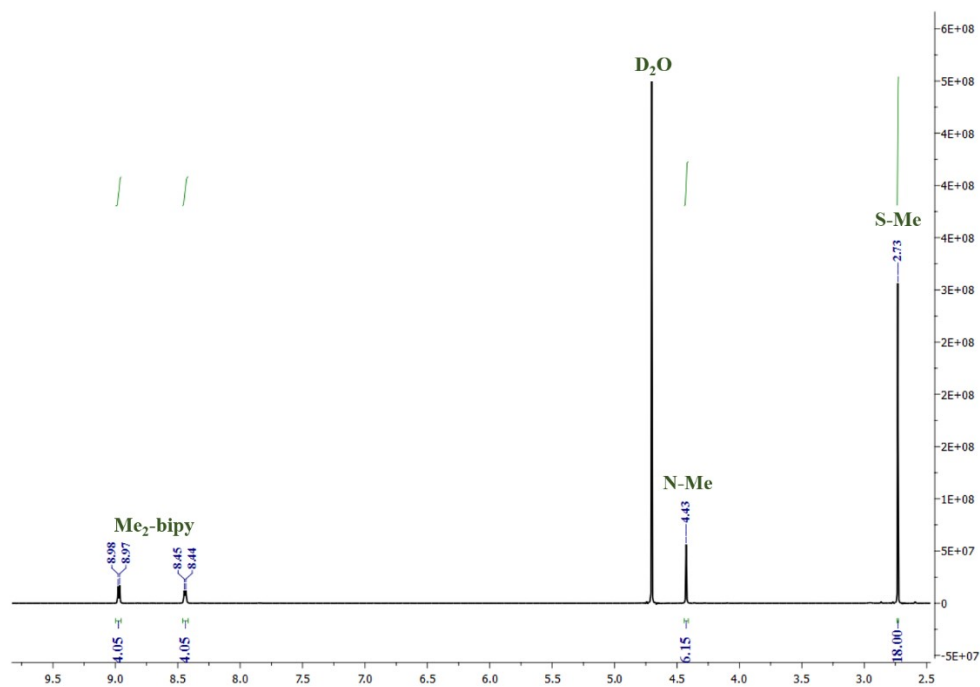

**Figure S4.**  $^1\text{H}$  NMR spectrum of  $[\{\text{Mg}(\text{OSO}_2\text{Me})_2(\text{H}_2\text{O})_4\}\text{MV}\cdot 2\text{OSO}_2\text{Me}]$  (**3**) in  $\text{D}_2\text{O}$ .

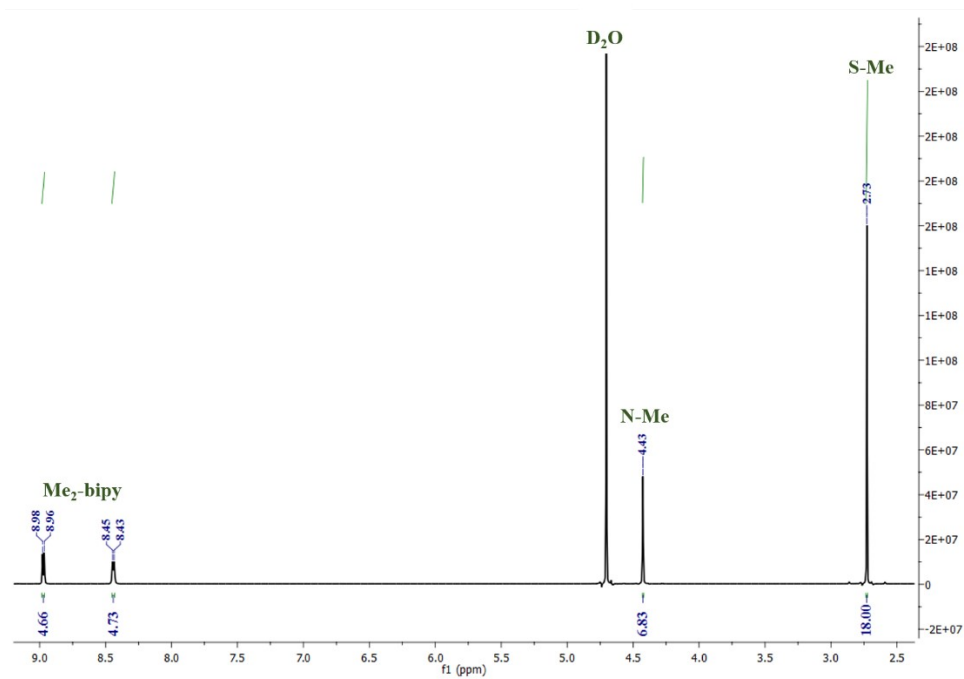

**Figure S5.**  $^1\text{H}$  NMR spectrum of  $[\text{Me}_4\text{-pip}\{\text{Ca}_2(\text{OSO}_2\text{Me})_6(\text{H}_2\text{O})_2\}]_n$  (**4**) in  $\text{D}_2\text{O}$ .

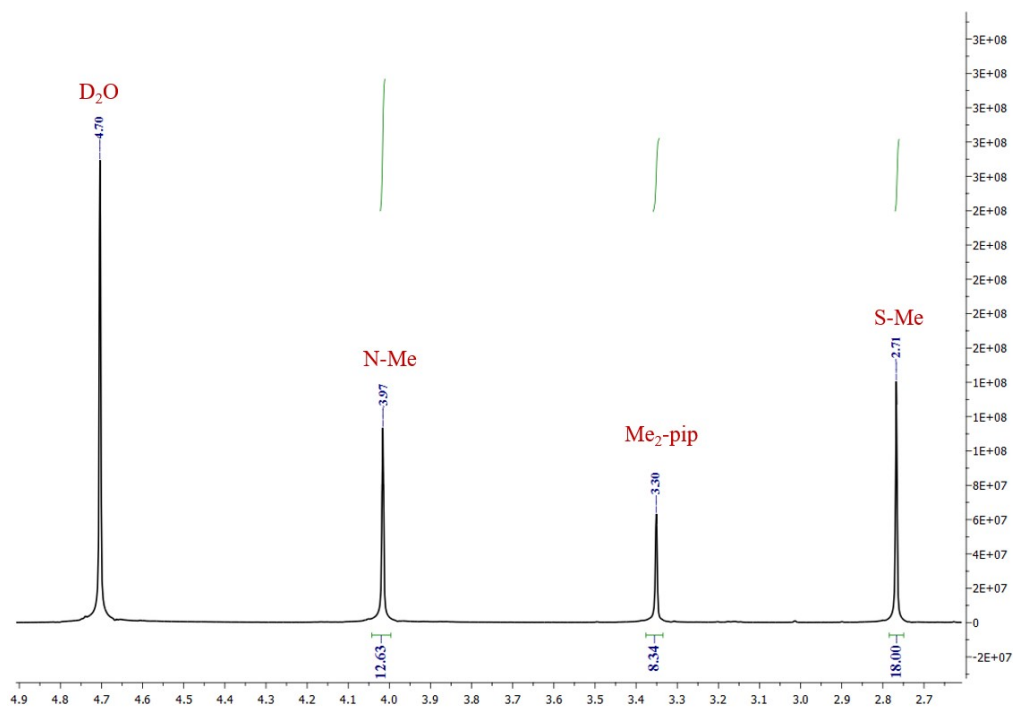

**Figure S6.** FT-IR spectrum of **1-4**.

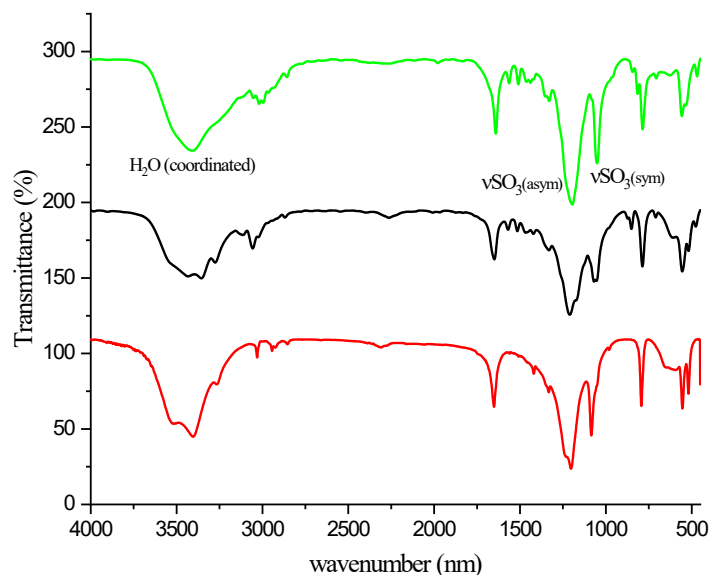

FT-IR spectrum of **1**(red), **2**(black) and **3**(green).

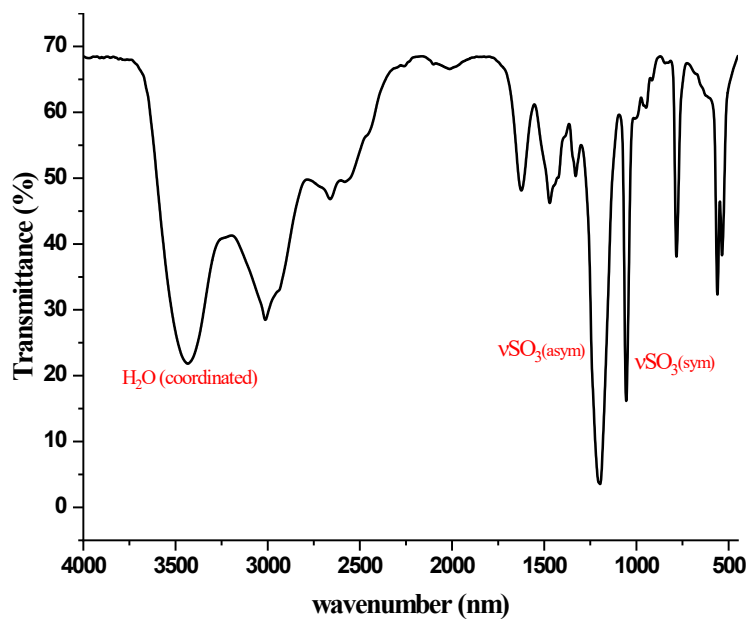

FT-IR spectrum of 4.

Figure S7. TGA profiles of 1-4.

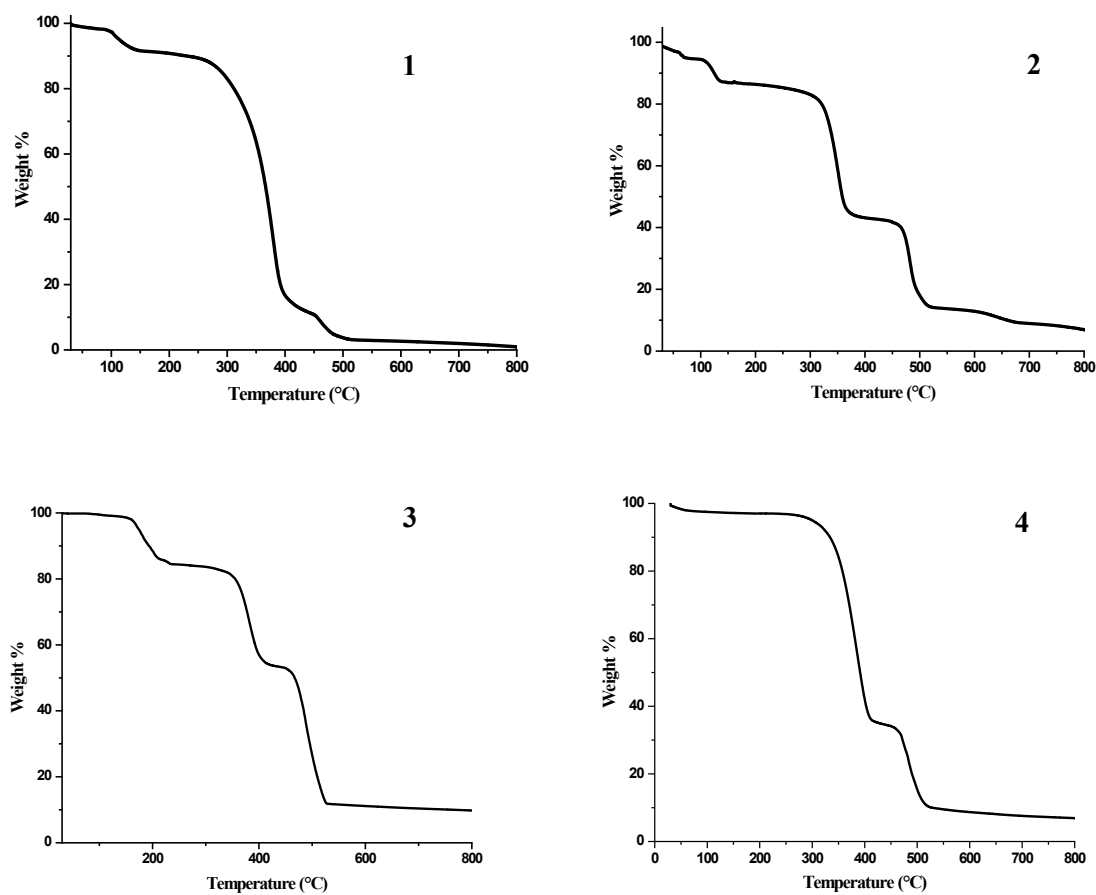

**Figure S8.** Cyclic Voltammogram of **1-3** showing repeated cycles.

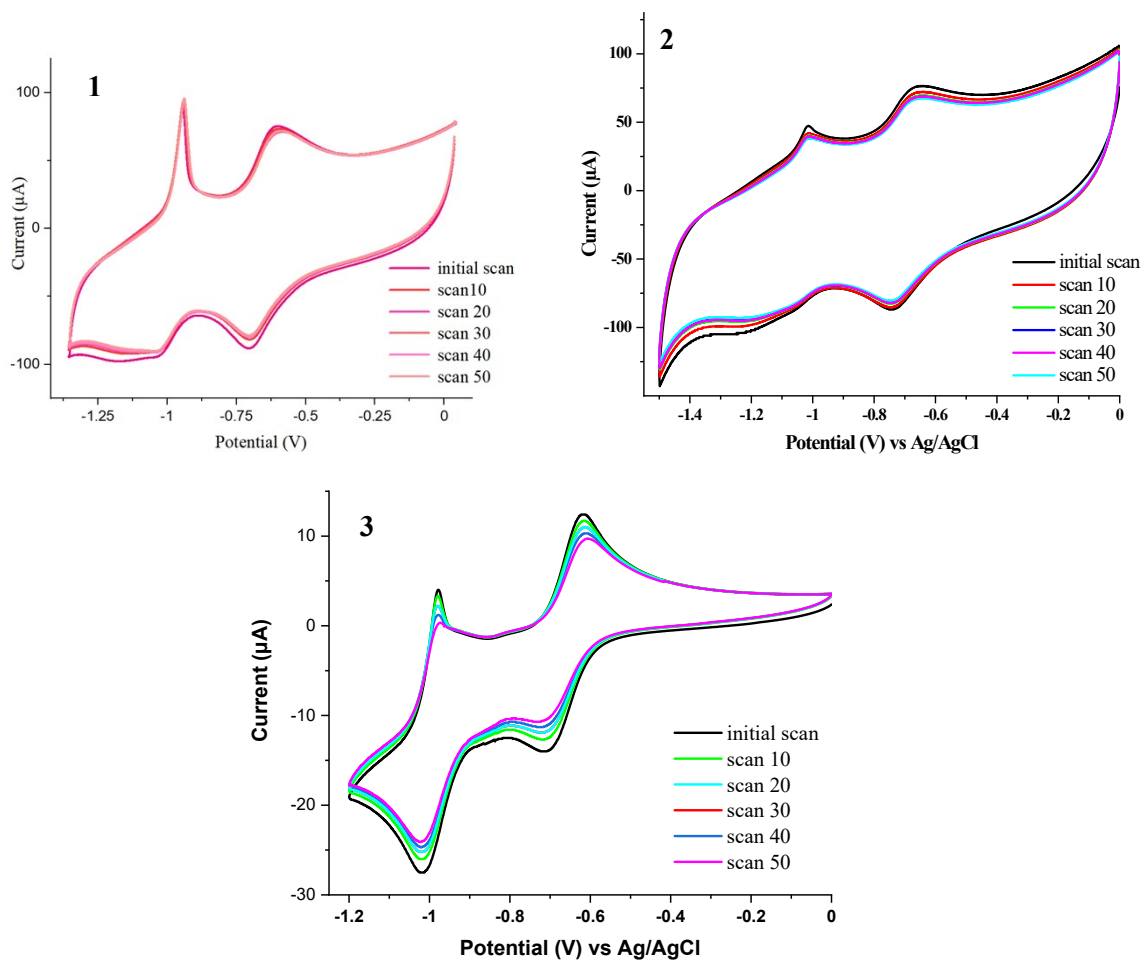

**Figure S9.** Perspective ORTEP and extended structure of **2**.

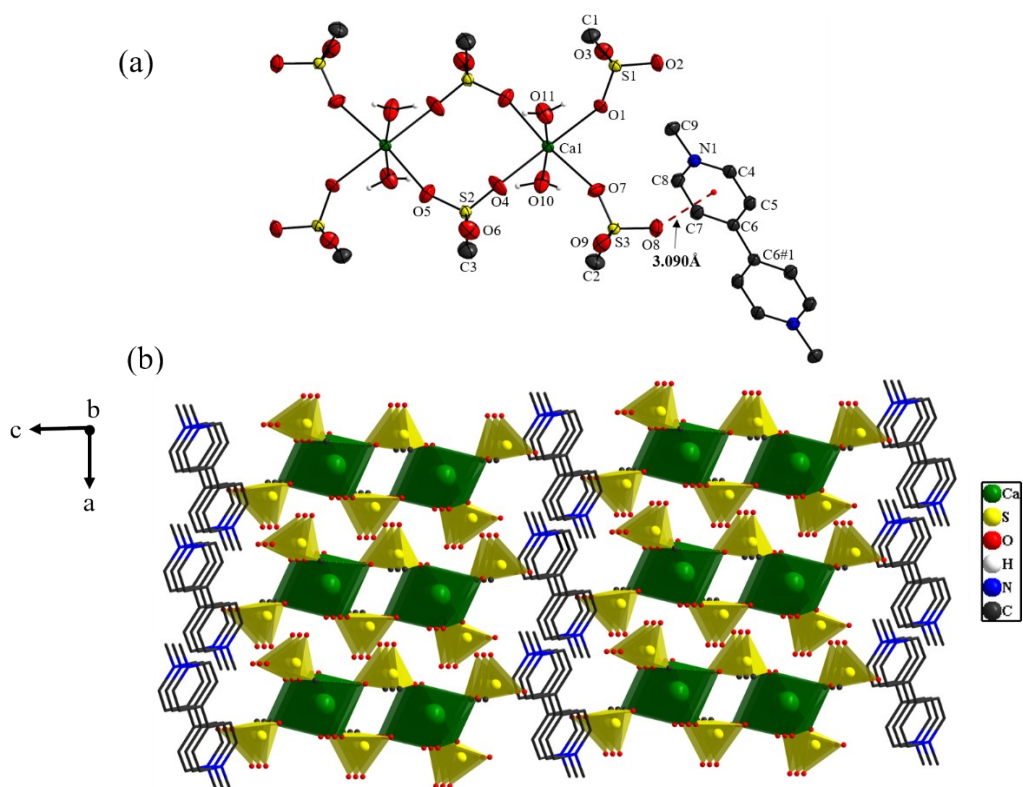

**Figure S10.** Extended structure of **4** along the *bc*-plane.

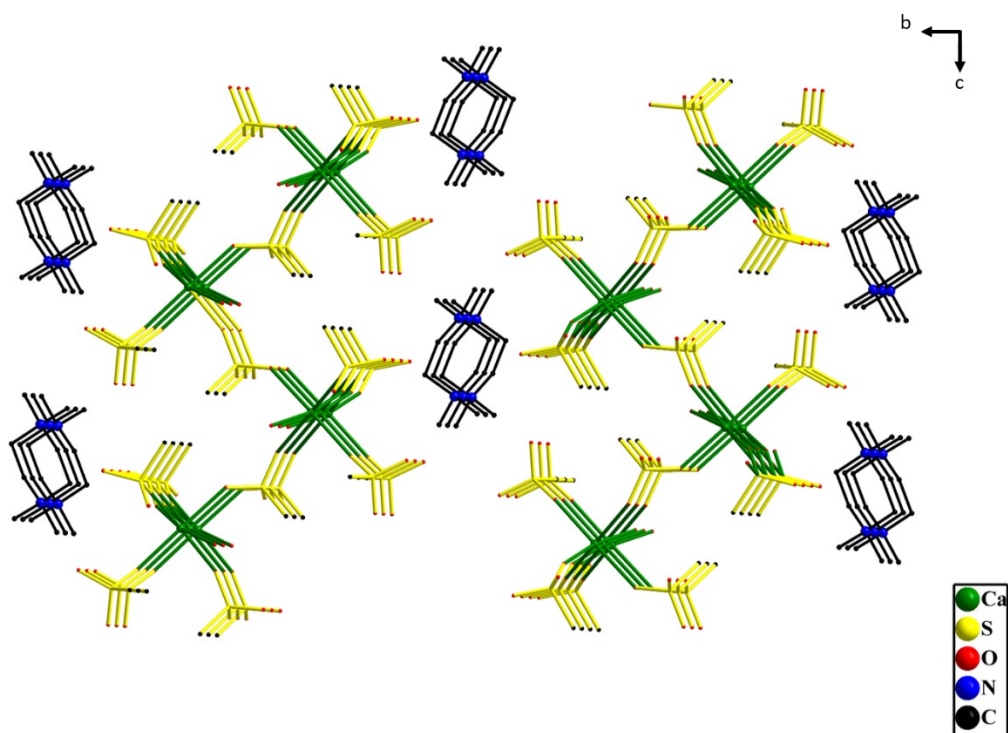

Figure S11. EPR Spectra of **2** and **3**.

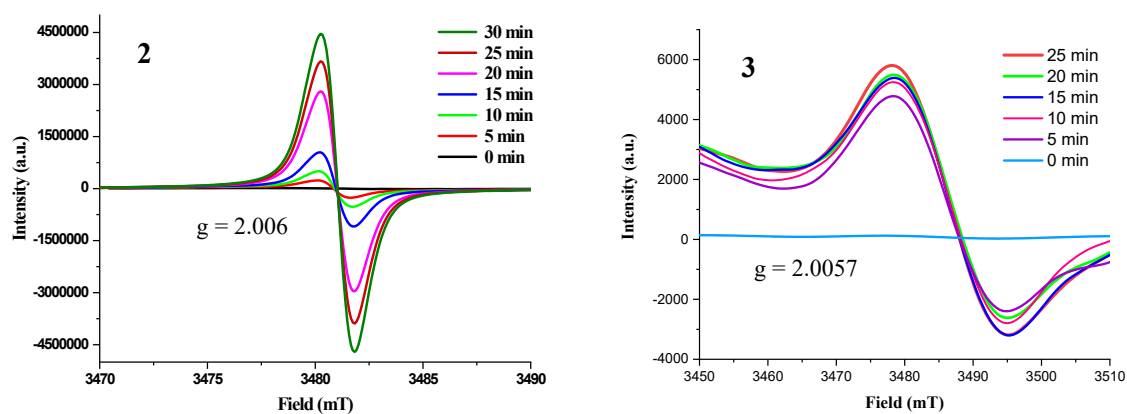

Figure S12. UV-vis diffused reflectance spectra of **2** and **3** under ambient light and Hg lamp.

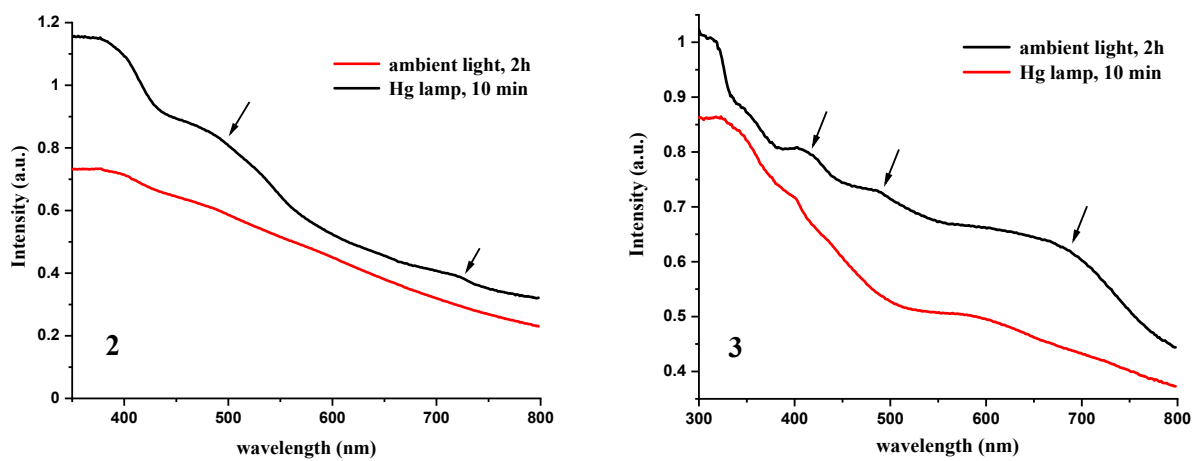

Figure S13. UV-vis spectrum of **2** in methanol.

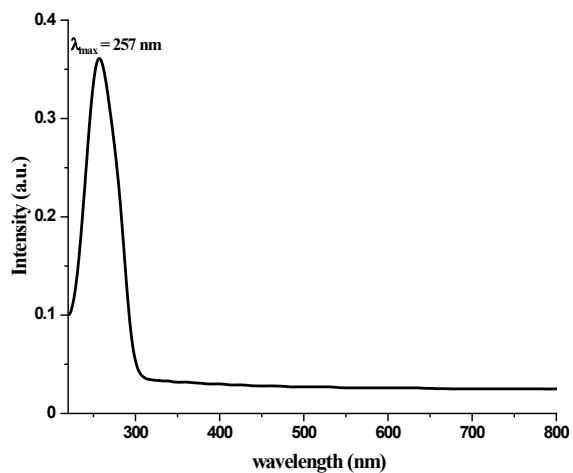

Supplement: d4dt02229g1.pdf [file d4dt02229g1.pdf]
